# Supplementary material for: Combining Clinical and Genetic Data to Predict Response to Fingolimod Treatment in Relapsing Remitting Multiple Sclerosis Patients: A Precision Medicine Approach
Source: MDPI journal article supplement (doi:10.3390/jpm13010122), 2023-01-06
Supplement: s1 [file s1]

**Supplementary Table S1: Genetic signature prioritized by the machine learning analysis**

|            |
|------------|
| rs10915271 |
| rs549148   |
| rs720887   |
| rs2488429  |
| rs203849   |
| rs2075992  |
| rs4653996  |
| rs853469   |
| rs12038267 |
| rs10802244 |
| rs2028380  |
| rs1561322  |
| rs2307466  |
| rs17035884 |
| rs4971790  |
| rs1045920  |
| rs2234500  |
| rs2708943  |
| rs6740091  |
| rs3755158  |
| rs6705679  |
| rs10460317 |
| rs263767   |
| rs11886926 |
| rs13081043 |
| rs9845152  |
| rs8180087  |
| rs333327   |
| rs17509456 |
| rs13314733 |
| rs2079169  |
| rs13115793 |
| rs10000695 |
| rs2004794  |
| rs2124935  |
| rs11957276 |
| rs268791   |
| rs918520   |
| rs262753   |
| rs9261578  |
| rs1264318  |
| rs3129296  |
| rs7761731  |

|            |
|------------|
| rs9474433  |
| rs10944770 |
| rs9361875  |
| rs2787897  |
| rs2235261  |
| rs2076193  |
| rs9456931  |
| rs683369   |
| rs760812   |
| rs12699798 |
| rs6963278  |
| rs10226192 |
| rs2237279  |
| rs12538253 |
| rs587499   |
| rs11136431 |
| rs4512398  |
| rs969365   |
| rs7017723  |
| rs4149256  |
| rs4998     |
| rs4236939  |
| rs1487173  |
| rs12678366 |
| rs1009759  |
| rs2033543  |
| rs11793821 |
| rs10780660 |
| rs4625093  |
| rs3765101  |
| rs12770204 |
| rs8463     |
| rs10906326 |
| rs2244677  |
| rs8177062  |
| rs11203042 |
| rs11192823 |
| rs17104648 |
| rs2237997  |
| rs3741097  |
| rs10161275 |
| rs10848775 |
| rs10842971 |
| rs12317270 |

|            |
|------------|
| rs11170177 |
| rs4762615  |
| rs4761051  |
| rs1564647  |
| rs2479758  |
| rs9566276  |
| rs2806900  |
| rs943601   |
| rs9318893  |
| rs319561   |
| rs938886   |
| rs17182592 |
| rs8003820  |
| rs12895930 |
| rs11850195 |
| rs1722791  |
| rs17815875 |
| rs2414680  |
| rs4886414  |
| rs4984343  |
| rs8048501  |
| rs187680   |
| rs254353   |
| rs1060253  |
| rs868874   |
| rs9962319  |
| rs4372773  |
| rs11084943 |
| rs501537   |
| rs6511422  |
| rs6055919  |
| rs4809688  |
| rs157640   |
| rs2426778  |
| rs8139582  |
| rs9617449  |

The table shows the list of the 123 SNPs prioritized by the genetic analysis.
